# Supplementary material
Source: publisher figshare collection journal article supplement (https://acs.figshare.com/ndownloader/files/5738313)
Supplement: Supplementary file 1 [file 5738313]

data_global
 
#====================================================================
 
# 1. SUBMISSION DETAILS
 

_publ_contact_author_name         'Dr. William B. Connick'       
_publ_contact_author_address
;     Department of Chemistry
      University of Cincinnati
      Cincinnati, OH 45221-0172 USA
;
_publ_contact_author_phone        '513 556 0148'
_publ_contact_author_fax          '513 556 9239'
_publ_contact_author_email        Bill.Connick@uc.edu
 
_publ_requested_journal           'J. Am. Chem. Soc.'
_publ_requested_category          ? 
_publ_requested_coeditor_name     ? 
_publ_contact_letter
;
Please deposit the following 1 crystal structure into the 
Cambridge Crystallographic Database. 
This work is part of a manuscript that is being submitted for 
review to J. Am. Chem. Soc.
;

#===================================================================
 
# 2. TITLE AND AUTHOR LIST
 
_publ_section_title
;
An Outer-Sphere Two-Electron Platinum Reagent
 
;
 
# The loop structure below should contain the names and addresses 
# of all authors, in the required order of publication. Repeat as 
# necessary.
 
loop_
 _publ_author_name
 _publ_author_address
      'Jude, Hershel'
;     Department of Chemistry
      University of Cincinnati
      Cincinnati, OH 45221-0172 USA
;
     'Krause Bauer, Jeanette A.'
;     Department of Chemistry
      University of Cincinnati
      Cincinnati, OH 45221-0172 USA
;
     'Connick, William B.'
;     Department of Chemistry
      University of Cincinnati
      Cincinnati, OH 45221-0172 USA
;

#==================================================================
  
data_2 
  
_audit_creation_method            SHELXL-97 
_chemical_name_systematic 
; 
 ? 
; 
_chemical_name_common             ? 
_chemical_melting_point           ? 
_chemical_formula_moiety          'C33 H40 N5 Pt, Cl3, 4H2O' 
_chemical_formula_sum             'C33 H48 Cl3 N5 O4 Pt' 
_chemical_formula_weight          880.20 
  
loop_ 
 _atom_type_symbol 
 _atom_type_description 
 _atom_type_scat_dispersion_real 
 _atom_type_scat_dispersion_imag 
 _atom_type_scat_source 
 'C'  'C'   0.0033   0.0016 
 'International Tables Vol C Tables 4.2.6.8 and 6.1.1.4' 
 'H'  'H'   0.0000   0.0000 
 'International Tables Vol C Tables 4.2.6.8 and 6.1.1.4' 
 'N'  'N'   0.0061   0.0033 
 'International Tables Vol C Tables 4.2.6.8 and 6.1.1.4' 
 'O'  'O'   0.0106   0.0060 
 'International Tables Vol C Tables 4.2.6.8 and 6.1.1.4' 
 'Cl'  'Cl'   0.1484   0.1585 
 'International Tables Vol C Tables 4.2.6.8 and 6.1.1.4' 
 'Pt'  'Pt'  -1.7033   8.3905 
 'International Tables Vol C Tables 4.2.6.8 and 6.1.1.4' 
  
_symmetry_cell_setting            Monoclinic 
_symmetry_space_group_name_H-M    'P 2(1)/c' 
  
loop_ 
 _symmetry_equiv_pos_as_xyz 
 'x, y, z' 
 '-x, y+1/2, -z+1/2' 
 '-x, -y, -z' 
 'x, -y-1/2, z-1/2' 
  
_cell_length_a                    23.5863(17) 
_cell_length_b                    15.7557(11) 
_cell_length_c                    10.2636(7) 
_cell_angle_alpha                 90.00 
_cell_angle_beta                  91.5510(10) 
_cell_angle_gamma                 90.00 
_cell_volume                      3812.7(5) 
_cell_formula_units_Z             4 
_cell_measurement_temperature     298(2) 
_cell_measurement_reflns_used     6114 
_cell_measurement_theta_min       2.37 
_cell_measurement_theta_max       27.91 
  
_exptl_crystal_description        plate 
_exptl_crystal_colour             yellow 
_exptl_crystal_size_max           0.38 
_exptl_crystal_size_mid           0.24 
_exptl_crystal_size_min           0.06 
_exptl_crystal_density_meas       ? 
_exptl_crystal_density_diffrn     1.533 
_exptl_crystal_density_method     'not measured' 
_exptl_crystal_F_000              1768 
_exptl_absorpt_coefficient_mu     3.931 
_exptl_absorpt_correction_type    'multi-scan' 
_exptl_absorpt_correction_T_min   0.3166 
_exptl_absorpt_correction_T_max   0.7983 
_exptl_absorpt_process_details    'SADABS, Sheldrick (1996)' 
  
_exptl_special_details 
; 
The crystal was coated with a light film of epoxy resin and 
mounted on the tip of a glass fiber.
 
The first 50 frames of data were recollected for a decay 
correction. The decay correction was applied simultaneously 
with the absorption correction in SADABS. No formal measure 
of the extent of decay is printed out by this program.

The final unit cell is obtained from the refinement of 
the XYZ weighted centroids of reflections above 20 \s(I).

; 
  
_diffrn_ambient_temperature       298(2) 
_diffrn_radiation_wavelength      0.71073 
_diffrn_radiation_type            MoK\a 
_diffrn_radiation_source          'sealed tube' 
_diffrn_radiation_monochromator   graphite 
_diffrn_measurement_device_type   'SMART 1K CCD Platform' 
_diffrn_measurement_method        '\w scans' 
_diffrn_detector_area_resol_mean  0.8 
_diffrn_standards_number          0 
_diffrn_standards_interval_count  ? 
_diffrn_standards_interval_time   ? 
_diffrn_standards_decay_%         ? 
_diffrn_reflns_number             37844 
_diffrn_reflns_av_R_equivalents   0.0404 
_diffrn_reflns_av_sigmaI/netI     0.0316 
_diffrn_reflns_limit_h_min        -29 
_diffrn_reflns_limit_h_max        29 
_diffrn_reflns_limit_k_min        -19 
_diffrn_reflns_limit_k_max        19 
_diffrn_reflns_limit_l_min        -12 
_diffrn_reflns_limit_l_max        12 
_diffrn_reflns_theta_min          1.73 
_diffrn_reflns_theta_max          26.37 
_reflns_number_total              7793 
_reflns_number_gt                 6615 
_reflns_threshold_expression      >2\s(I) 
  
_computing_data_collection        'SMART v5.622' 
_computing_cell_refinement        'SAINT v6.02A' 
_computing_data_reduction         'SAINT v6.02A' 
_computing_structure_solution     'SHELXTL v6.1' 
_computing_structure_refinement   'SHELXTL v6.1' 
_computing_molecular_graphics     'SHELXTL v6.1' 
_computing_publication_material   'SHELXTL v6.1' 
  
_refine_special_details 
; 
Refinement of F^2^ against ALL reflections.  The weighted R-factor 
wR and goodness of fit S are based on F^2^, conventional R-factors 
R are based on F, with F set to zero for negative F^2^. The threshold 
expression of F^2^ > 2sigma(F^2^) is used only for calculating 
R-factors(gt) etc. and is not relevant to the choice of reflections 
for refinement.  R-factors based on F^2^ are statistically about 
twice as large as those based on F, and R-factors based on ALL data 
will be even larger. 

The NH hydrogen atoms were located directly while the remaining 
hydrogen atoms were included in calculated positions and treated 
with a riding model. Hydroen atom isotropic displacement parameters 
were assigned as a*U~eq~ of the adjacent atom where a=1.5 for -OH 
and 1.2 for all others. One of the chloride ions is disordered 
(occupancy set at 0.5). The molecule crystallizes with 4 waters, 
one of which is disordered (occupancy set at 0.5). The highest 
residual peaks are all near the disordered atoms.
; 
  
_refine_ls_structure_factor_coef  Fsqd 
_refine_ls_matrix_type            full 
_refine_ls_weighting_scheme       calc 
_refine_ls_weighting_details 
 'calc w=1/[\s^2^(Fo^2^)+(0.0658P)^2^+21.0649P] where P=(Fo^2^+2Fc^2^)/3' 
_atom_sites_solution_primary      direct 
_atom_sites_solution_secondary    difmap 
_atom_sites_solution_hydrogens    mixed 
_refine_ls_hydrogen_treatment     mixed 
_refine_ls_extinction_method      none 
_refine_ls_extinction_coef        ? 
_refine_ls_number_reflns          7793 
_refine_ls_number_parameters      433 
_refine_ls_number_restraints      0 
_refine_ls_R_factor_all           0.0644 
_refine_ls_R_factor_gt            0.0527 
_refine_ls_wR_factor_ref          0.1460 
_refine_ls_wR_factor_gt           0.1405 
_refine_ls_goodness_of_fit_ref    1.125 
_refine_ls_restrained_S_all       1.125 
_refine_ls_shift/su_max           0.002 
_refine_ls_shift/su_mean          0.000 
  
loop_ 
 _atom_site_label 
 _atom_site_type_symbol 
 _atom_site_fract_x 
 _atom_site_fract_y 
 _atom_site_fract_z 
 _atom_site_U_iso_or_equiv 
 _atom_site_adp_type 
 _atom_site_occupancy 
 _atom_site_symmetry_multiplicity 
 _atom_site_calc_flag 
 _atom_site_refinement_flags 
 _atom_site_disorder_assembly 
 _atom_site_disorder_group 
Pt Pt 0.259126(12) 0.534748(17) 0.01620(3) 0.03654(11) Uani 1 1 d . . . 
Cl1 Cl 0.39697(11) 0.35320(13) 0.3953(3) 0.0658(6) Uani 1 1 d . . . 
Cl2 Cl 0.11293(13) 0.66538(17) 0.0961(3) 0.0771(7) Uani 1 1 d . . . 
Cl3A Cl 0.09873(17) 0.2511(3) 0.3770(4) 0.0541(11) Uani 0.50 1 d P . . 
Cl3B Cl 0.3940(2) 0.58173(19) 0.7284(5) 0.0582(12) Uani 0.50 1 d P . . 
N1 N 0.3133(3) 0.5787(4) 0.1577(6) 0.0396(14) Uani 1 1 d . . . 
N2 N 0.2041(3) 0.5342(4) -0.1368(7) 0.0430(15) Uani 1 1 d . . . 
N3 N 0.2561(2) 0.6597(4) -0.0204(6) 0.0386(14) Uani 1 1 d . . . 
N4 N 0.3841(3) 0.3454(4) -0.1015(6) 0.0409(14) Uani 1 1 d . . . 
H4 H 0.3843 0.2885 -0.0862 0.049 Uiso 1 1 calc R . . 
N5 N 0.1298(3) 0.4193(4) 0.2406(7) 0.0498(17) Uani 1 1 d . . . 
H5 H 0.1236 0.3660 0.2712 0.060 Uiso 1 1 calc R . . 
C1 C 0.3424(4) 0.5347(5) 0.2477(9) 0.0460(19) Uani 1 1 d . . . 
H1A H 0.3387 0.4759 0.2484 0.055 Uiso 1 1 calc R . . 
C2 C 0.3773(4) 0.5717(6) 0.3389(9) 0.050(2) Uani 1 1 d . . . 
H2A H 0.3955 0.5387 0.4023 0.060 Uiso 1 1 calc R . . 
C3 C 0.3855(4) 0.6576(6) 0.3368(9) 0.052(2) Uani 1 1 d . . . 
H3A H 0.4102 0.6834 0.3968 0.063 Uiso 1 1 calc R . . 
C4 C 0.3566(3) 0.7052(5) 0.2446(9) 0.049(2) Uani 1 1 d . . . 
H4A H 0.3615 0.7637 0.2415 0.059 Uiso 1 1 calc R . . 
C5 C 0.3199(3) 0.6649(5) 0.1560(8) 0.0408(17) Uani 1 1 d . . . 
C6 C 0.2852(3) 0.7115(5) 0.0564(7) 0.0400(17) Uani 1 1 d . . . 
C7 C 0.2794(4) 0.7985(5) 0.0387(9) 0.054(2) Uani 1 1 d . . . 
H7A H 0.2999 0.8366 0.0905 0.065 Uiso 1 1 calc R . . 
C8 C 0.2425(4) 0.8264(5) -0.0571(9) 0.054(2) Uani 1 1 d . . . 
H8A H 0.2377 0.8846 -0.0684 0.064 Uiso 1 1 calc R . . 
C9 C 0.2123(4) 0.7719(5) -0.1376(9) 0.051(2) Uani 1 1 d . . . 
H9A H 0.1881 0.7920 -0.2037 0.061 Uiso 1 1 calc R . . 
C10 C 0.2197(3) 0.6844(5) -0.1152(8) 0.0454(19) Uani 1 1 d . . . 
C11 C 0.1907(3) 0.6141(5) -0.1836(8) 0.0430(17) Uani 1 1 d . . . 
C12 C 0.1522(4) 0.6253(6) -0.2852(8) 0.051(2) Uani 1 1 d . . . 
H12A H 0.1442 0.6796 -0.3158 0.062 Uiso 1 1 calc R . . 
C13 C 0.1258(4) 0.5566(7) -0.3412(9) 0.059(2) Uani 1 1 d . . . 
H13A H 0.0998 0.5639 -0.4100 0.071 Uiso 1 1 calc R . . 
C14 C 0.1383(4) 0.4757(6) -0.2942(9) 0.059(2) Uani 1 1 d . . . 
H14A H 0.1206 0.4281 -0.3304 0.071 Uiso 1 1 calc R . . 
C15 C 0.1772(4) 0.4675(6) -0.1933(9) 0.051(2) Uani 1 1 d . . . 
H15A H 0.1855 0.4133 -0.1622 0.061 Uiso 1 1 calc R . . 
C16 C 0.2573(3) 0.4092(5) 0.0605(7) 0.0358(16) Uani 1 1 d . . . 
C17 C 0.2245(3) 0.3754(5) 0.1589(8) 0.0423(17) Uani 1 1 d . . . 
C18 C 0.2192(4) 0.2886(5) 0.1816(9) 0.050(2) Uani 1 1 d . . . 
H18A H 0.1988 0.2693 0.2521 0.060 Uiso 1 1 calc R . . 
C19 C 0.2445(4) 0.2308(5) 0.0987(9) 0.052(2) Uani 1 1 d . . . 
H19A H 0.2389 0.1729 0.1101 0.062 Uiso 1 1 calc R . . 
C20 C 0.2780(3) 0.2596(5) -0.0010(9) 0.049(2) Uani 1 1 d . . . 
H20A H 0.2956 0.2213 -0.0559 0.059 Uiso 1 1 calc R . . 
C21 C 0.2852(3) 0.3478(5) -0.0181(7) 0.0406(17) Uani 1 1 d . . . 
C22 C 0.3239(3) 0.3723(5) -0.1266(8) 0.0464(19) Uani 1 1 d . . . 
H22A H 0.3100 0.3466 -0.2072 0.056 Uiso 1 1 calc R . . 
H22B H 0.3227 0.4334 -0.1379 0.056 Uiso 1 1 calc R . . 
C23 C 0.4195(4) 0.3620(6) -0.2194(8) 0.054(2) Uani 1 1 d . . . 
H23A H 0.4031 0.3318 -0.2937 0.064 Uiso 1 1 calc R . . 
H23B H 0.4185 0.4221 -0.2393 0.064 Uiso 1 1 calc R . . 
C24 C 0.4800(4) 0.3346(7) -0.1989(11) 0.070(3) Uani 1 1 d . . . 
H24A H 0.4814 0.2735 -0.1875 0.084 Uiso 1 1 calc R . . 
H24B H 0.5013 0.3487 -0.2755 0.084 Uiso 1 1 calc R . . 
C25 C 0.5067(5) 0.3765(8) -0.0827(12) 0.081(3) Uani 1 1 d . . . 
H25A H 0.5086 0.4373 -0.0967 0.097 Uiso 1 1 calc R . . 
H25B H 0.5450 0.3554 -0.0685 0.097 Uiso 1 1 calc R . . 
C26 C 0.4711(4) 0.3574(8) 0.0364(11) 0.077(3) Uani 1 1 d . . . 
H26A H 0.4712 0.2968 0.0528 0.093 Uiso 1 1 calc R . . 
H26B H 0.4878 0.3854 0.1124 0.093 Uiso 1 1 calc R . . 
C27 C 0.4101(4) 0.3880(6) 0.0146(9) 0.057(2) Uani 1 1 d . . . 
H27A H 0.3882 0.3753 0.0909 0.068 Uiso 1 1 calc R . . 
H27B H 0.4098 0.4490 0.0017 0.068 Uiso 1 1 calc R . . 
C28 C 0.1919(4) 0.4341(6) 0.2472(9) 0.054(2) Uani 1 1 d . . . 
H28A H 0.2055 0.4262 0.3364 0.065 Uiso 1 1 calc R . . 
H28B H 0.1994 0.4924 0.2230 0.065 Uiso 1 1 calc R . . 
C29 C 0.1054(4) 0.4229(6) 0.1059(8) 0.054(2) Uani 1 1 d . . . 
H29A H 0.1138 0.4777 0.0679 0.064 Uiso 1 1 calc R . . 
H29B H 0.1229 0.3795 0.0534 0.064 Uiso 1 1 calc R . . 
C30 C 0.0433(4) 0.4100(7) 0.1041(12) 0.072(3) Uani 1 1 d . . . 
H30A H 0.0351 0.3527 0.1328 0.086 Uiso 1 1 calc R . . 
H30B H 0.0285 0.4160 0.0155 0.086 Uiso 1 1 calc R . . 
C31 C 0.0132(5) 0.4741(8) 0.1931(14) 0.093(4) Uani 1 1 d . . . 
H31A H 0.0175 0.5311 0.1590 0.112 Uiso 1 1 calc R . . 
H31B H -0.0270 0.4613 0.1944 0.112 Uiso 1 1 calc R . . 
C32 C 0.0383(5) 0.4695(8) 0.3296(13) 0.088(4) Uani 1 1 d . . . 
H32A H 0.0216 0.5133 0.3827 0.106 Uiso 1 1 calc R . . 
H32B H 0.0293 0.4149 0.3676 0.106 Uiso 1 1 calc R . . 
C33 C 0.1004(5) 0.4804(7) 0.3307(10) 0.075(3) Uani 1 1 d . . . 
H33A H 0.1153 0.4723 0.4189 0.090 Uiso 1 1 calc R . . 
H33B H 0.1091 0.5381 0.3049 0.090 Uiso 1 1 calc R . . 
O1W O 0.2971(4) 0.4732(5) 0.5607(10) 0.102(3) Uani 1 1 d . . . 
H1W1 H 0.3218 0.4446 0.5185 0.152 Uiso 1 1 d . . . 
H1W2 H 0.3224 0.5017 0.6055 0.152 Uiso 1 1 d . . . 
O2W O 0.4900(5) 0.5696(8) 0.5498(13) 0.140(4) Uani 1 1 d . . . 
H2W1 H 0.5218 0.5935 0.5648 0.210 Uiso 1 1 d . . . 
H2W2 H 0.4618 0.5749 0.6006 0.210 Uiso 1 1 d . . . 
O3WA O 0.0630(7) 0.6904(10) 0.3970(16) 0.084(5) Uani 0.50 1 d P A -1 
H3W1 H 0.0705 0.6975 0.3118 0.126 Uiso 0.50 1 d P B -1 
H3W2 H 0.0757 0.7293 0.4493 0.126 Uiso 0.50 1 d P C -1 
O3WB O 0.0245(10) 0.7057(14) 0.494(3) 0.131(8) Uani 0.50 1 d P D -2 
H3W3 H -0.0070 0.7168 0.5254 0.197 Uiso 0.50 1 d P E -2 
H3W4 H 0.0490 0.7413 0.5222 0.050 Uiso 0.50 1 d P F -2 
O4W O 0.0545(7) 0.3199(9) 0.6167(17) 0.194(7) Uani 1 1 d . . . 
H4W1 H 0.0623 0.2941 0.5461 0.291 Uiso 1 1 d . . . 
H4W2 H 0.0293 0.3136 0.6775 0.291 Uiso 1 1 d . . . 
  
loop_ 
 _atom_site_aniso_label 
 _atom_site_aniso_U_11 
 _atom_site_aniso_U_22 
 _atom_site_aniso_U_33 
 _atom_site_aniso_U_23 
 _atom_site_aniso_U_13 
 _atom_site_aniso_U_12 
Pt 0.03875(17) 0.03075(16) 0.04014(17) 0.00043(12) 0.00154(11) 0.00159(12) 
Cl1 0.0640(14) 0.0352(10) 0.0985(19) 0.0030(11) 0.0049(13) -0.0070(9) 
Cl2 0.0809(18) 0.0595(15) 0.0913(19) -0.0065(13) 0.0098(15) -0.0109(13) 
Cl3A 0.044(2) 0.057(2) 0.062(2) 0.036(2) 0.0072(18) -0.0040(18) 
Cl3B 0.074(3) 0.0087(14) 0.090(3) -0.0056(16) -0.032(2) 0.0153(15) 
N1 0.041(3) 0.034(3) 0.043(3) -0.002(3) -0.002(3) -0.002(3) 
N2 0.039(3) 0.046(4) 0.044(4) -0.004(3) 0.008(3) 0.002(3) 
N3 0.033(3) 0.037(3) 0.046(4) 0.013(3) 0.004(3) 0.005(3) 
N4 0.047(4) 0.035(3) 0.041(3) 0.000(3) 0.006(3) -0.001(3) 
N5 0.057(4) 0.041(4) 0.051(4) 0.000(3) 0.016(3) 0.003(3) 
C1 0.043(4) 0.040(4) 0.056(5) 0.006(4) -0.002(4) 0.005(3) 
C2 0.045(5) 0.049(5) 0.056(5) 0.001(4) -0.013(4) -0.002(4) 
C3 0.049(5) 0.055(5) 0.053(5) -0.007(4) -0.002(4) -0.005(4) 
C4 0.045(5) 0.040(4) 0.062(5) -0.008(4) 0.006(4) -0.003(4) 
C5 0.040(4) 0.033(4) 0.050(4) -0.003(3) 0.004(3) -0.001(3) 
C6 0.044(4) 0.038(4) 0.039(4) 0.002(3) 0.005(3) -0.005(3) 
C7 0.061(5) 0.037(4) 0.064(6) -0.002(4) 0.014(4) -0.006(4) 
C8 0.061(5) 0.033(4) 0.066(6) 0.007(4) 0.012(5) 0.005(4) 
C9 0.055(5) 0.043(4) 0.055(5) 0.013(4) 0.006(4) 0.011(4) 
C10 0.046(4) 0.041(4) 0.050(5) 0.006(4) 0.016(4) 0.003(3) 
C11 0.044(4) 0.042(4) 0.043(4) 0.000(3) 0.009(3) 0.005(3) 
C12 0.052(5) 0.054(5) 0.049(5) 0.003(4) 0.000(4) 0.010(4) 
C13 0.054(5) 0.076(6) 0.046(5) -0.003(5) -0.011(4) 0.010(5) 
C14 0.058(6) 0.066(6) 0.052(5) -0.010(4) -0.004(4) -0.002(5) 
C15 0.049(5) 0.054(5) 0.050(5) -0.001(4) 0.000(4) 0.001(4) 
C16 0.045(4) 0.039(4) 0.023(3) -0.017(3) -0.003(3) 0.001(3) 
C17 0.043(4) 0.039(4) 0.044(4) -0.003(3) -0.001(3) 0.000(3) 
C18 0.048(5) 0.041(4) 0.061(5) 0.009(4) 0.006(4) -0.004(4) 
C19 0.045(5) 0.036(4) 0.076(6) 0.010(4) 0.001(4) 0.002(3) 
C20 0.037(4) 0.041(4) 0.071(6) 0.000(4) 0.007(4) 0.006(3) 
C21 0.036(4) 0.043(4) 0.042(4) 0.005(3) -0.005(3) -0.001(3) 
C22 0.050(5) 0.043(4) 0.047(4) 0.005(3) 0.006(4) 0.010(4) 
C23 0.059(5) 0.056(5) 0.047(5) -0.004(4) 0.016(4) -0.007(4) 
C24 0.057(6) 0.079(7) 0.076(7) 0.001(6) 0.028(5) -0.003(5) 
C25 0.060(6) 0.092(8) 0.092(8) -0.008(7) 0.011(6) -0.014(6) 
C26 0.054(6) 0.110(9) 0.067(6) -0.004(6) -0.006(5) -0.012(6) 
C27 0.058(5) 0.061(5) 0.052(5) -0.014(4) 0.007(4) -0.008(4) 
C28 0.057(5) 0.056(5) 0.049(5) -0.008(4) 0.012(4) -0.004(4) 
C29 0.061(5) 0.051(5) 0.049(5) 0.002(4) 0.007(4) 0.010(4) 
C30 0.061(6) 0.070(7) 0.085(7) 0.007(6) -0.001(5) 0.010(5) 
C31 0.060(7) 0.103(10) 0.118(11) 0.032(8) 0.023(7) 0.026(6) 
C32 0.089(9) 0.085(8) 0.094(9) 0.000(7) 0.049(8) 0.025(6) 
C33 0.100(9) 0.073(7) 0.054(6) -0.013(5) 0.032(6) 0.019(6) 
O1W 0.100(7) 0.080(6) 0.126(8) 0.025(5) 0.014(6) -0.011(5) 
O2W 0.100(8) 0.159(9) 0.159(10) -0.030(9) -0.029(7) -0.039(7) 
O3WA 0.075(10) 0.084(11) 0.093(11) -0.022(9) 0.026(9) -0.008(8) 
O3WB 0.106(15) 0.116(16) 0.17(2) 0.001(16) -0.013(15) -0.026(13) 
O4W 0.207(16) 0.146(12) 0.232(17) -0.008(11) 0.042(13) -0.036(11) 
  
_geom_special_details 
; 
All esds (except the esd in the dihedral angle between two l.s. 
planes) are estimated using the full covariance matrix.  The cell 
esds are taken into account individually in the estimation of esds 
in distances, angles and torsion angles; correlations between esds 
in cell parameters are only used when they are defined by crystal 
symmetry.  An approximate (isotropic) treatment of cell esds is 
used for estimating esds involving l.s. planes. 
; 
  
loop_ 
 _geom_bond_atom_site_label_1 
 _geom_bond_atom_site_label_2 
 _geom_bond_distance 
 _geom_bond_site_symmetry_2 
 _geom_bond_publ_flag 
Pt N3 2.005(6) . ? 
Pt N2 2.010(7) . ? 
Pt N1 2.030(6) . ? 
Pt C16 2.031(8) . ? 
N1 C1 1.330(10) . ? 
N1 C5 1.368(9) . ? 
N2 C15 1.349(11) . ? 
N2 C11 1.382(10) . ? 
N3 C6 1.316(10) . ? 
N3 C10 1.337(10) . ? 
N4 C27 1.486(10) . ? 
N4 C22 1.499(10) . ? 
N4 C23 1.511(10) . ? 
N5 C28 1.482(11) . ? 
N5 C29 1.484(11) . ? 
N5 C33 1.516(11) . ? 
C1 C2 1.361(12) . ? 
C2 C3 1.368(12) . ? 
C3 C4 1.373(12) . ? 
C4 C5 1.391(11) . ? 
C5 C6 1.485(11) . ? 
C6 C7 1.389(11) . ? 
C7 C8 1.367(13) . ? 
C8 C9 1.377(13) . ? 
C9 C10 1.409(11) . ? 
C10 C11 1.470(12) . ? 
C11 C12 1.375(12) . ? 
C12 C13 1.368(13) . ? 
C13 C14 1.393(13) . ? 
C14 C15 1.371(13) . ? 
C16 C17 1.394(11) . ? 
C16 C21 1.430(10) . ? 
C17 C18 1.394(11) . ? 
C17 C28 1.519(11) . ? 
C18 C19 1.392(12) . ? 
C19 C20 1.386(12) . ? 
C20 C21 1.412(11) . ? 
C21 C22 1.509(11) . ? 
C23 C24 1.500(13) . ? 
C24 C25 1.488(15) . ? 
C25 C26 1.531(15) . ? 
C26 C27 1.528(14) . ? 
C29 C30 1.480(13) . ? 
C30 C31 1.548(16) . ? 
C31 C32 1.509(19) . ? 
C32 C33 1.474(17) . ? 
  
loop_ 
 _geom_angle_atom_site_label_1 
 _geom_angle_atom_site_label_2 
 _geom_angle_atom_site_label_3 
 _geom_angle 
 _geom_angle_site_symmetry_1 
 _geom_angle_site_symmetry_3 
 _geom_angle_publ_flag 
N3 Pt N2 80.7(3) . . ? 
N3 Pt N1 79.5(3) . . ? 
N2 Pt N1 160.2(3) . . ? 
N3 Pt C16 176.0(3) . . ? 
N2 Pt C16 98.8(3) . . ? 
N1 Pt C16 100.9(3) . . ? 
C1 N1 C5 118.0(7) . . ? 
C1 N1 Pt 128.4(5) . . ? 
C5 N1 Pt 113.5(5) . . ? 
C15 N2 C11 117.4(7) . . ? 
C15 N2 Pt 128.7(6) . . ? 
C11 N2 Pt 113.8(5) . . ? 
C6 N3 C10 124.7(7) . . ? 
C6 N3 Pt 118.8(5) . . ? 
C10 N3 Pt 116.2(5) . . ? 
C27 N4 C22 112.3(6) . . ? 
C27 N4 C23 109.8(6) . . ? 
C22 N4 C23 110.8(6) . . ? 
C28 N5 C29 113.2(7) . . ? 
C28 N5 C33 109.8(8) . . ? 
C29 N5 C33 111.8(7) . . ? 
N1 C1 C2 123.0(8) . . ? 
C1 C2 C3 119.8(8) . . ? 
C2 C3 C4 118.8(8) . . ? 
C3 C4 C5 119.4(8) . . ? 
N1 C5 C4 120.9(7) . . ? 
N1 C5 C6 116.1(7) . . ? 
C4 C5 C6 123.1(7) . . ? 
N3 C6 C7 119.0(8) . . ? 
N3 C6 C5 112.0(6) . . ? 
C7 C6 C5 129.0(8) . . ? 
C8 C7 C6 118.1(9) . . ? 
C7 C8 C9 122.7(8) . . ? 
C8 C9 C10 116.9(8) . . ? 
N3 C10 C9 118.6(8) . . ? 
N3 C10 C11 114.2(7) . . ? 
C9 C10 C11 127.2(8) . . ? 
C12 C11 N2 121.3(8) . . ? 
C12 C11 C10 123.7(8) . . ? 
N2 C11 C10 114.9(7) . . ? 
C13 C12 C11 120.1(8) . . ? 
C12 C13 C14 119.2(9) . . ? 
C15 C14 C13 118.7(9) . . ? 
N2 C15 C14 123.2(8) . . ? 
C17 C16 C21 115.0(7) . . ? 
C17 C16 Pt 123.4(5) . . ? 
C21 C16 Pt 121.3(5) . . ? 
C16 C17 C18 123.4(7) . . ? 
C16 C17 C28 120.0(7) . . ? 
C18 C17 C28 116.6(7) . . ? 
C19 C18 C17 119.8(8) . . ? 
C20 C19 C18 120.0(8) . . ? 
C19 C20 C21 119.1(8) . . ? 
C20 C21 C16 122.5(7) . . ? 
C20 C21 C22 114.8(7) . . ? 
C16 C21 C22 122.7(7) . . ? 
N4 C22 C21 112.9(6) . . ? 
C24 C23 N4 112.5(8) . . ? 
C25 C24 C23 111.4(9) . . ? 
C24 C25 C26 108.9(9) . . ? 
C27 C26 C25 110.8(9) . . ? 
N4 C27 C26 110.0(8) . . ? 
N5 C28 C17 113.2(7) . . ? 
C30 C29 N5 111.4(8) . . ? 
C29 C30 C31 111.9(10) . . ? 
C32 C31 C30 109.9(9) . . ? 
C33 C32 C31 111.5(9) . . ? 
C32 C33 N5 113.0(10) . . ? 
  
_diffrn_measured_fraction_theta_max    0.998 
_diffrn_reflns_theta_full              26.37 
_diffrn_measured_fraction_theta_full   0.998 
_refine_diff_density_max    2.441 
_refine_diff_density_min   -1.721 
_refine_diff_density_rms    0.160 

# eof for data_2 =================================
